# Supplementary material for: Cost-effectiveness of faecal calprotectin used in primary care in the diagnosis of inflammatory bowel disease
Source: PubMed Central journal article supplement — BMJ Open. 2019 Apr 14;9(4):e027043. doi: 10.1136/bmjopen-2018-027043 (PMC6500206; doi:10.1136/bmjopen-2018-027043), 2019-04-14
Supplement: bmjopen-2018-027043supp001.pdf [file bmjopen-2018-027043supp001.pdf]

## Supplementary File

### Meta-analysis for sensitivity and specificity of blood test

Jellema et al. conducted a high quality systematic review that summarized the evidence on the performance of different diagnostic tests including the blood tests (C-reactive protein (CRP) and erythrocyte sedimentation rate (ESR)) in patients with abdominal symptoms.<sup>1</sup> They identified four studies that investigated the diagnostic performance of CRP or ESR with different diagnostic cut-off points. The gastroenterologists (Drs. Rosenfeld and Chavannes) in our study selected the studies and the cut-off points that are most relevant to the clinical practice.

**Table 1. Diagnostic performance of studies with test cut-offs of CRP  $\geq 5\text{mg/l}$  and ESR  $\geq 15\text{mm/h}$**

| Study                                                               | True Positives | False Positives | True Negatives | False Negatives |
|---------------------------------------------------------------------|----------------|-----------------|----------------|-----------------|
| Kaiser <i>et al</i> , 2007 <sup>2</sup>                             | 29             | 5               | 19             | 21              |
| Poullis <i>et al</i> , 2002 <sup>3</sup>                            | 11             | 16              | 143            | 9               |
| Shine <i>et al</i> , 1985 <sup>4</sup>                              | 32             | 9               | 32             | 9               |
| The numbers were directly obtained from Jellema et al. <sup>1</sup> |                |                 |                |                 |

Subsequently, we have attempted to model these data using a bivariate analysis to take account of the correlation between the sensitivity and specificity based on Reitsma et al.<sup>5</sup> (model specification shown on page 988). However, the estimated covariance matrix was not full rank and might be unreliable, possibly due to our small sample size (only 3 studies). Therefore, we estimated the sensitivity and specificity independently (i.e., without accounting for the correlation between the sensitivity and specificity). The logit estimates for sensitivity and specificity were 0.613 (SE=0.199) and 1.867 (0.196), respectively.

### Cost-effectiveness plane for our base case

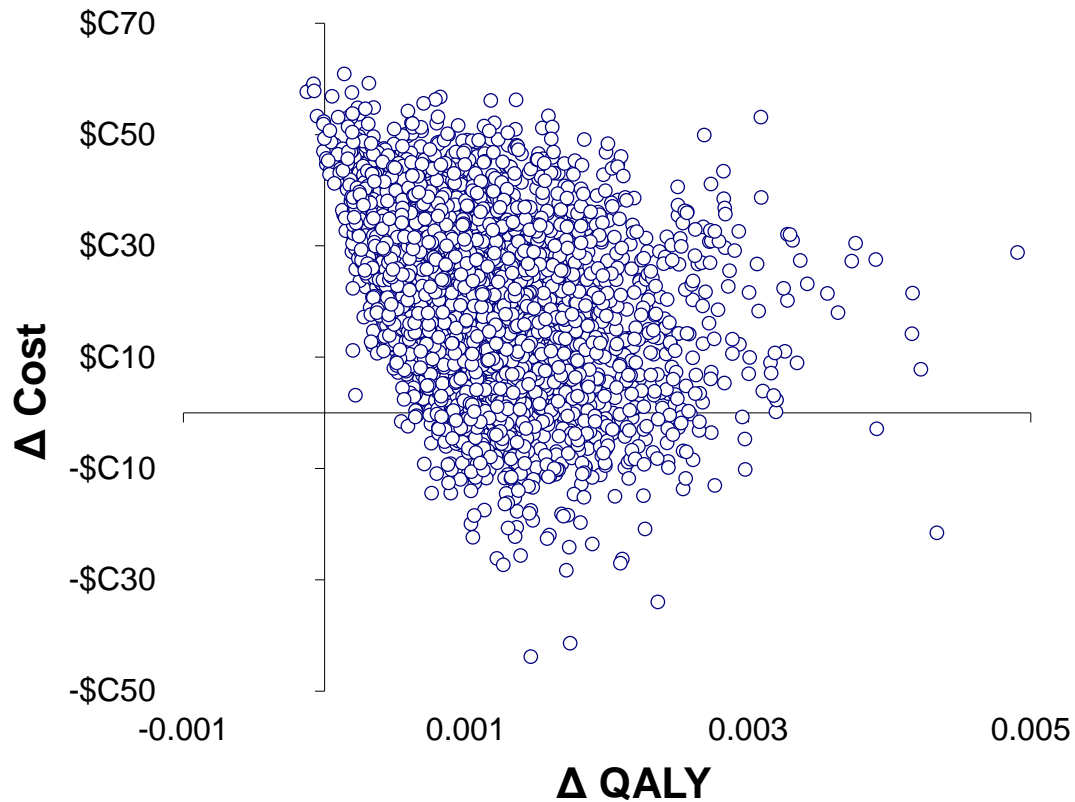

### References

1. Jellema P, Windt D a. WM van der, Schellevis FG, et al. Systematic review: accuracy of symptom-based criteria for diagnosis of irritable bowel syndrome in primary care. *Aliment. Pharmacol. Ther.* 2009;30:695–706.
2. Kaiser T, Langhorst J, Wittkowski H, et al. Faecal S100A12 as a non-invasive marker distinguishing inflammatory bowel disease from irritable bowel syndrome. *Gut.* 2007;56:1706–1713.
3. Poullis AP, Zar S, Sundaram KK, et al. A new, highly sensitive assay for C-reactive protein can aid the differentiation of inflammatory bowel disorders from constipation- and

diarrhoea-predominant functional bowel disorders. *Eur J Gastroenterol Hepatol.* 2002;14:409–412.

4. Shine B, Berghouse L, Jones JE, et al. C-reactive protein as an aid in the differentiation of functional and inflammatory bowel disorders. *Clin. Chim. Acta.* 1985;148:105–109.
5. Reitsma JB, Glas AS, Rutjes AWS, et al. Bivariate analysis of sensitivity and specificity produces informative summary measures in diagnostic reviews. *J Clin Epidemiol.* 2005;58:982–990.
